# Supplementary material for: Altered effective connectivity in sensorimotor cortices is a signature of severity and clinical course in depression
Source: PubMed Central journal article supplement (PMC8501855; doi:10.1073/pnas.2105730118), 2021-09-30
Supplement: pnas.2105730118.sapp.pdf [file pnas.2105730118.sapp.pdf]

## Group Mean Effective Connectivity

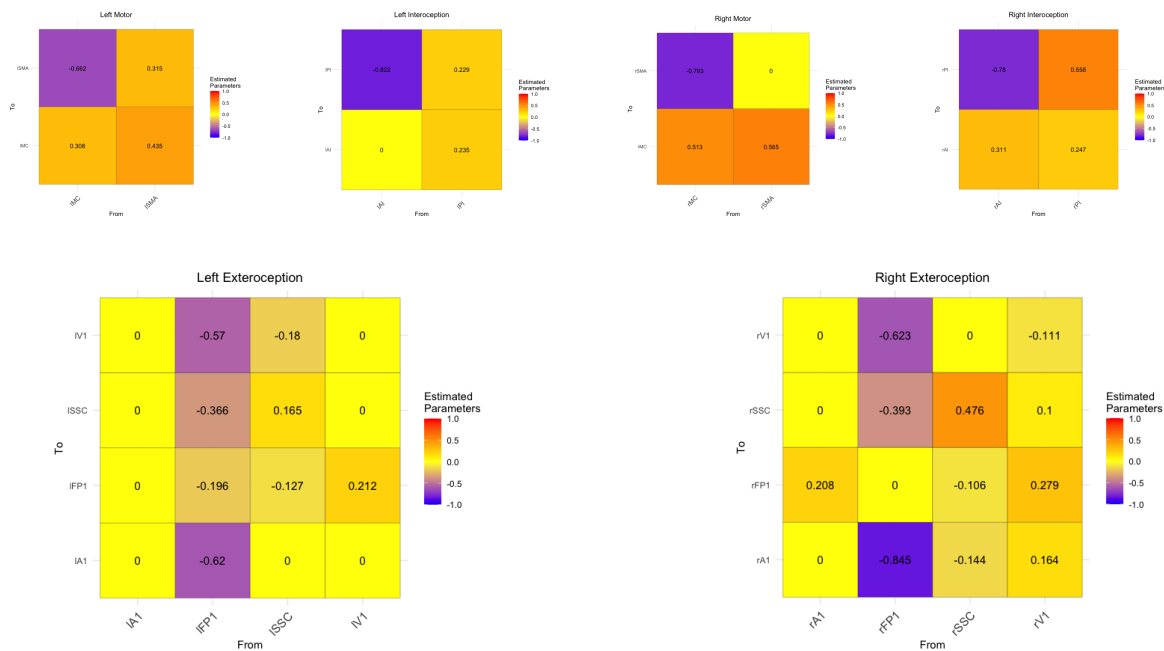

## Changes in effective connectivity with BDI scores

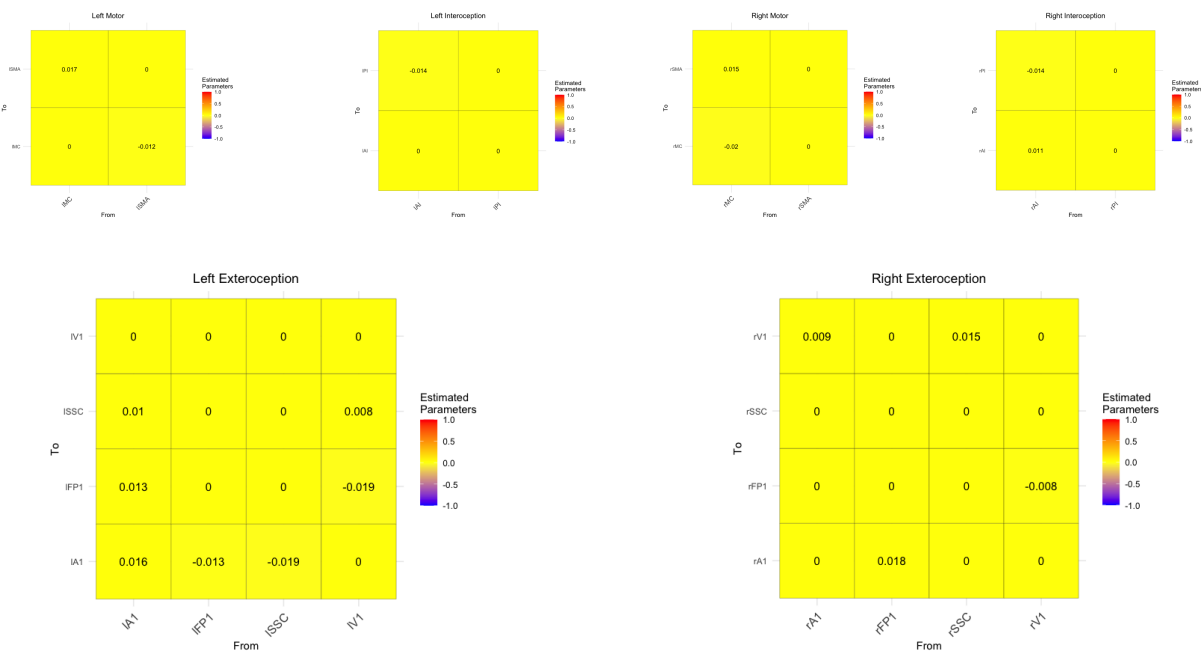

Supplementary Figure 1: Estimated parameters in the primary session

## Group Mean Effective Connectivity

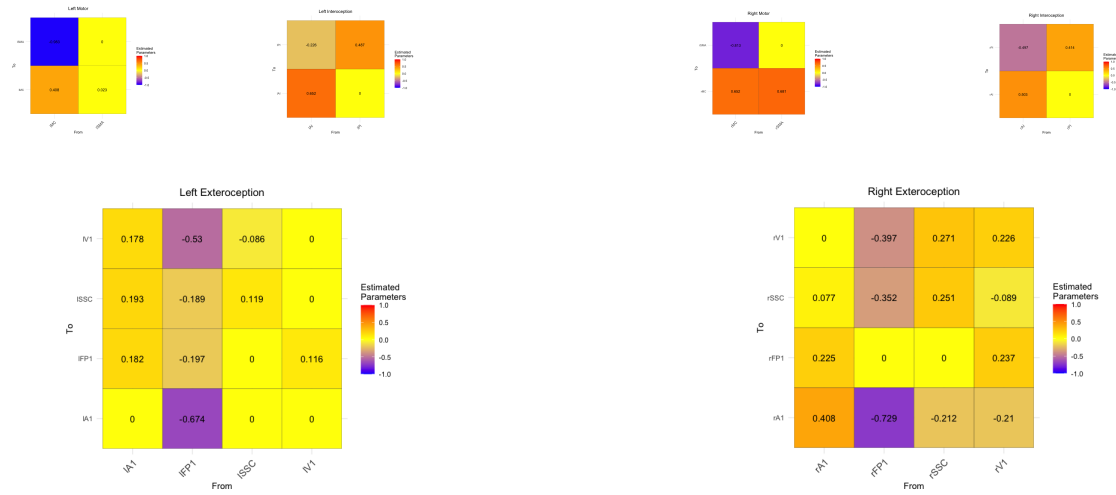

## Changes in effective connectivity with BDI scores

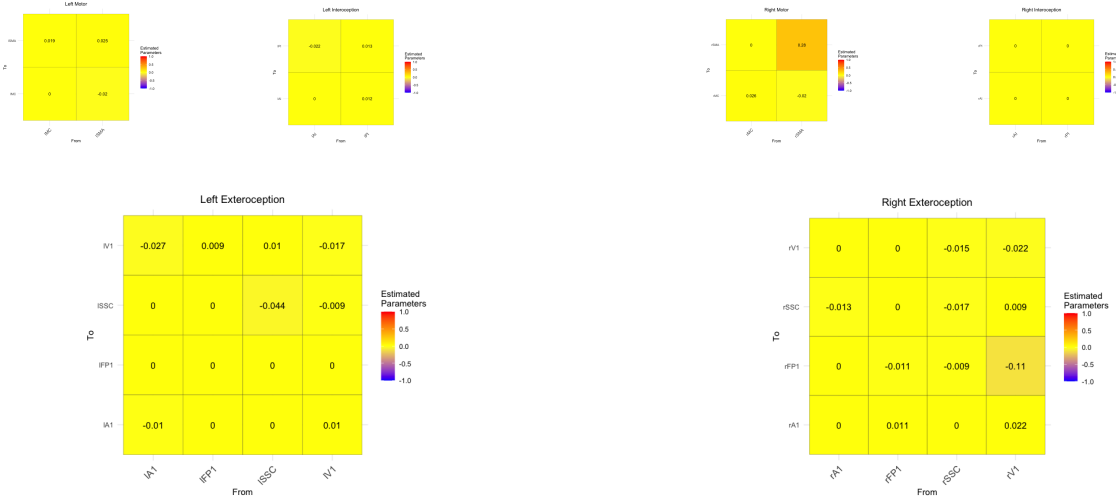

## Changes in effective connectivity with treatment

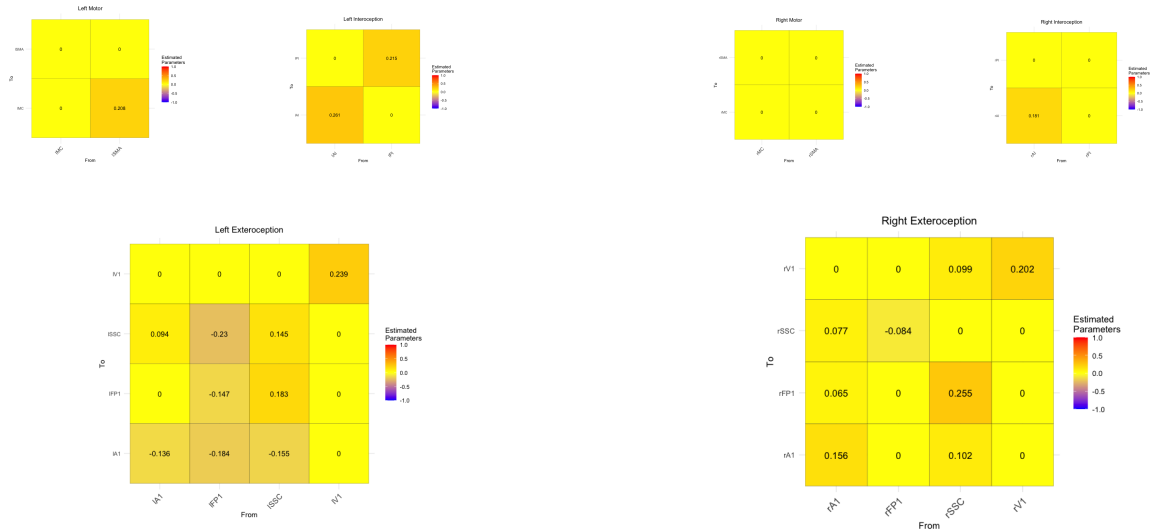

Supplementary Figure 2: Estimated parameters in the follow-up session
